# Supplementary material for: Absence of Depressive and Anxious Behavior with Genetic Dysregulation in Adult C57Bl/6J Mice after Prenatal Exposure to Ionizing Radiation
Source: MDPI journal article supplement (doi:10.3390/ijms24108466), 2023-05-09
Supplement: s1 [file s1]

## Supplementary Information

Table S1. Primer Design

| Pathway                           | Gene          | Accession #        | Forward Primer (5' → 3')     | Reverse Primer (5' → 3') |
|-----------------------------------|---------------|--------------------|------------------------------|--------------------------|
| ROS Regulation                    | SOD1          | NM_011434          | CGGATGAAGAGAGGCATGTTG<br>GA  | CAATGATGGAATGCTCTCCTGAG  |
|                                   | SOD2          | NM_013671          | TTACGACTATGGCGCGCTGGA        | TCGTGGTACTTCTCCTCGGTG    |
|                                   | SOD3          | NM_011435          | GGCCTGTGGCTCTGTCACC          | CCTATCTTCTCAACCAGGTCAAG  |
|                                   | Catalase      | NM_009804          | CCTGACATGGTCTGGGAC           | CCATAGCCATTCATGTGCCG     |
|                                   | GPX1          | NM_008160          | GGTGCTGCTCATTGAGAATGT<br>CG  | GGGAAACCGAGCACCACCAG     |
| Cortisol<br>Regulation            | HSD11β1       | NM_0010447<br>51   | GAAGAGTTCAGACCAGAAATG<br>CT  | CAATACCACATGGGCTCCCATT   |
|                                   | HSD11β2       | NM_008289          | TCTTTGGTGCACCTTGAGCTGAC<br>C | AGGCTGCCAAGCAGGGGTATG    |
|                                   | GR            | NM_0013612<br>09   | AGGCCGCTCAGTGTTTTCTA         | TACAGCTTCCACACGTCAGC     |
| Cell Cycle                        | BTG2          | NM_007393.<br>3    | GGCTGTATCCCCCTCCATCG         | CCAGTTGGTAACAATGCCATGT   |
| DNA Damage &<br>Tumor Suppression | γH2AX         | NM_010436          | GCCTCTCAGGAGTACTGAGGG        | CCCGAAGTGGCTCAGCTCTTT    |
|                                   | p53           | AB020317           | GGAAGACTCCAGTGGAACC          | TCTTCTGTACGGCGGTCTCT     |
|                                   | GADD45A       | NM_007836          | GAAAGGATGGACACGGTGGG         | GGGTCTACGTTGAGCAGC       |
|                                   | DDB2          | NM_028119.<br>5    | ACCGAGTACGTCATGGCTCCC        | CTTGGCTTCGGGCTCCAGCT     |
|                                   | MDM2          | NM_0012885<br>86   | CCTGGATCAGGATTCAGTTTCT<br>G  | TCATCATCCTCATCTGAGAGCTC  |
| DNA<br>Methylation                | DNMT3A        | NM_007872          | GAGGGAAGTCTGAGACCCAC         | CTGGAAGGTGAGTCTTGGCA     |
|                                   | DNMT3B        | NM_0011229<br>97   | AGCGGGTATGAGGAGTGCAT         | GGGAGCATCCTTCGTGTCTG     |
|                                   | DNMT1         | NM_0011994<br>33   | AAGCCTGGTGTTGTCTACCGA<br>C   | CATCCAGGTTGCTCCCCTTG     |
| Circadian<br>Rhythm               | Per2          | NM_011066          | ACAAGAAGGCCAAGGGGAAG<br>G    | GGCTCTACTGGACATTAGCAG    |
| Synaptic Activity                 | Doublecortin  | NM_0011102<br>22   | ATGTCAACCGGGAAGCACA          | TGGTGGAACCACAGCAACTT     |
|                                   | NeuN          | NM_0010391<br>68   | GGCAAATGTTTCGGCAATTCTG       | TCAATTTTCCGTCCCTCTACGAT  |
|                                   | NeuroD        | NM_010894.<br>2    | ATGACCAAATCATACAGCGAG<br>AG  | TCTGCCTCGTGTTCCTCGT      |
|                                   | PSD-95        | NM_007864.<br>3    | GGCGGAGAGGAACTTGTC           | AGAATTGGCCTTGAGGGAGGA    |
|                                   | Synaptophysin | NM_009305.<br>2    | CAGTTCGGGTGGTCAAGG           | ACTCTCCGTCTGTGTCAC       |
|                                   | NOS3          | NM_008713          | TTTGCTGCCCTTGGCCTGCG         | CTCTGAACTCATGTACCAGCCG   |
|                                   | NRF2          | NM_010902          | CAGCACATCCAGACAGACACC<br>A   | TGGGAATGTCTCTGCCAAAAGCT  |
| Microglia                         | TMEM119       | NM_146162          | TTCACCCAGAGCTGGTTCCAT<br>A   | GAGTGACACAGAGTAGGCCA     |
| Apoptosis                         | CX3CR1        | NM_009987.<br>4    | TCACCGTCATCAGCATCGAC         | CGCCCAGACTAATGGTGACA     |
|                                   | BAX           | NM_007527          | CTGGATCCAAGACCAGGGTG         | GTGAGGACTCCAGCCACAAA     |
|                                   | BCL2          | NM_009741          | GCGTCAACAGGGAGATGTCA         | GCATGCTGGGGCCATATAGT     |
|                                   | APAF1         | NM_0012829<br>47.1 | CGTCTTCCAGTGTAAGGACAG<br>T   | CCATAGATGGTGACCCACCC     |
| Reference<br>Genes                | Beta Actin    | NM_007393.<br>3    | GGCTGTATCCCCCTCCATCG         | CCAGTTGGTAACAATGCCATGT   |

|  |       |                 |                      |                      |
|--|-------|-----------------|----------------------|----------------------|
|  | RPL29 | NM_009082.<br>2 | ACATGGCCAAGTCCAAGAAC | TGCATCTTCTTCAGGCCTTT |
|--|-------|-----------------|----------------------|----------------------|

All primers listed were designed using Primer Bank, Primer3, Primer3Plus, or Gemi. Annealing temperature was 58 degrees Celsius.
